# Supplementary material
Source: MDPI journal article supplement (https://www.mdpi.com/2073-4441/14/9/1323)
Supplement: s1 [file s1]

## Supporting Information

### **Mechanistic insight into degradation of cetirizine under UV/chlorine**

#### **treatment: Experimental and quantum chemical studies**

Boyi Zhu<sup>#</sup>, Fangyuan Cheng<sup>#</sup>, Wenjing Zhong, Jiao Qu, Ya-nan Zhang<sup>\*</sup>, Hongbin Yu<sup>\*</sup>

State Environmental Protection Key Laboratory of Wetland Ecology and Vegetation Restoration, School of Environment, Northeast Normal University, Changchun 130117, P. R. China; zhuby551@nenu.edu.cn (B.Z.); chengfy310@nenu.edu.cn (F.C.); zhongwj598@nenu.edu.cn (W.Z.); quj100@nenu.edu.cn (J.Q.)

<sup>\*</sup> Correspondence: zhangyn912@nenu.edu.cn (Y.Z.); yuhb108@nenu.edu.cn (H.Y.)

<sup>#</sup> Boyi Zhu and Fangyuan Cheng contributed equally to this work.

Number of figures: 11; Number of tables: 3; Number of pages: 17

## Table of Contents

|                 |         |
|-----------------|---------|
| Figure S1.....  | S3      |
| Figure S2.....  | S3      |
| Figure S3.....  | S4      |
| Figure S4.....  | S4      |
| Figure S5.....  | S5      |
| Figure S6.....  | S6-S7   |
| Figure S7.....  | S8      |
| Figure S8.....  | S9-S10  |
| Figure S9.....  | S11-S12 |
| Figure S10..... | S13-S14 |
| Figure S11..... | S15     |
| Table S1.....   | S15     |
| Table S2.....   | S16     |
| Table S3.....   | S17     |

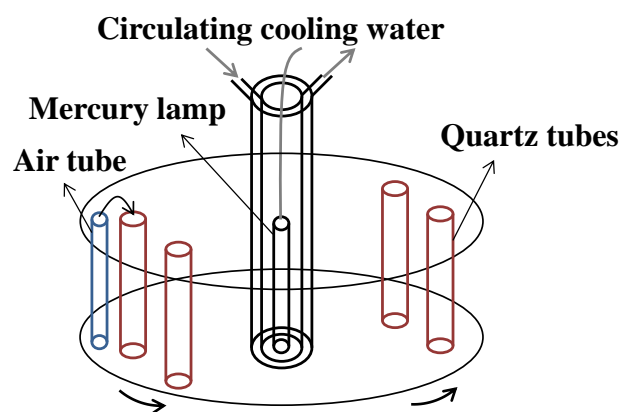

**Figure S1.** Photochemical reactor system diagram

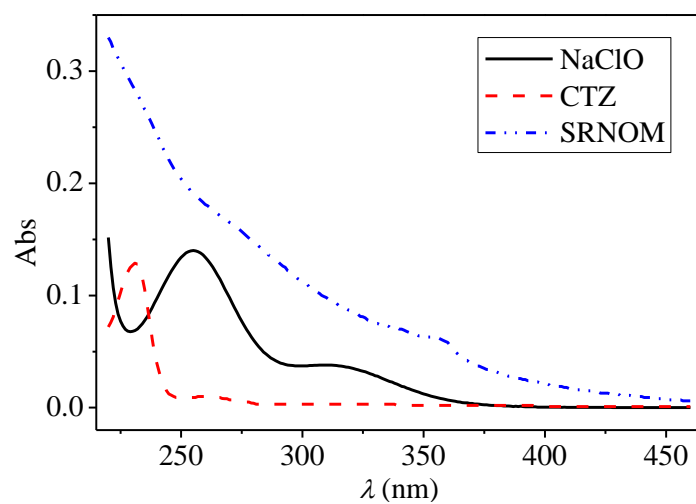

**Figure S2.** UV-Vis absorption spectra of NaClO (500  $\mu\text{M}$ ), CTZ (10  $\mu\text{M}$ ), and SRNOM (10  $\text{mg L}^{-1}$ )

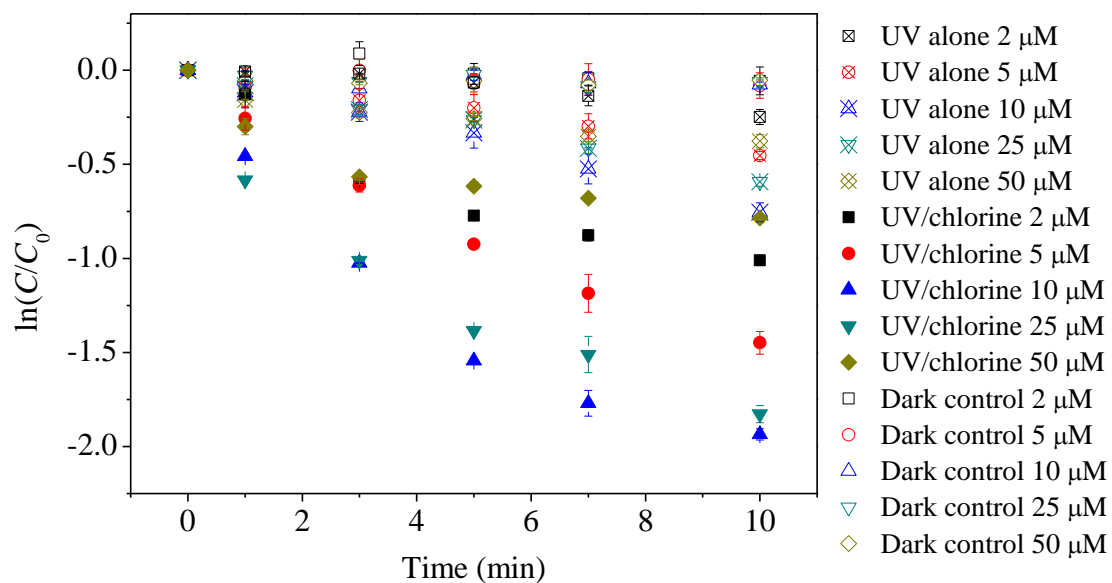

**Figure S3.** Degradation kinetics of CTZ with different concentrations in UV/chlorine system ( $\text{pH} = 7.0$ ,  $[\text{Free chlorine}]_0 = 100 \mu\text{M}$ , the concentration values in the figure are for CTZ).

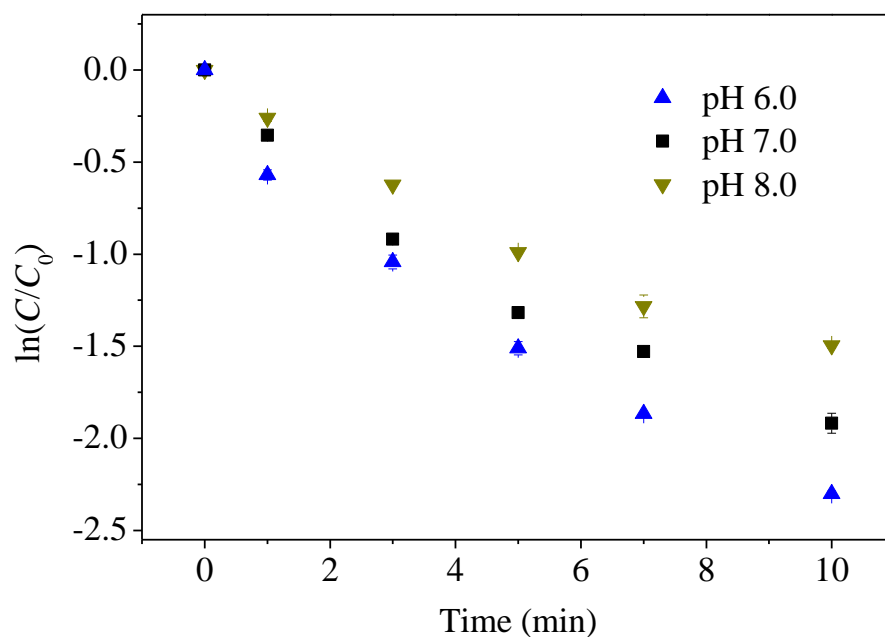

**Figure S4.** Degradation kinetics of CTZ in UV/chlorine system with different pH values ( $[\text{CTZ}]_0 = 10 \mu\text{M}$ ,  $[\text{Free chlorine}]_0 = 100 \mu\text{M}$ ).

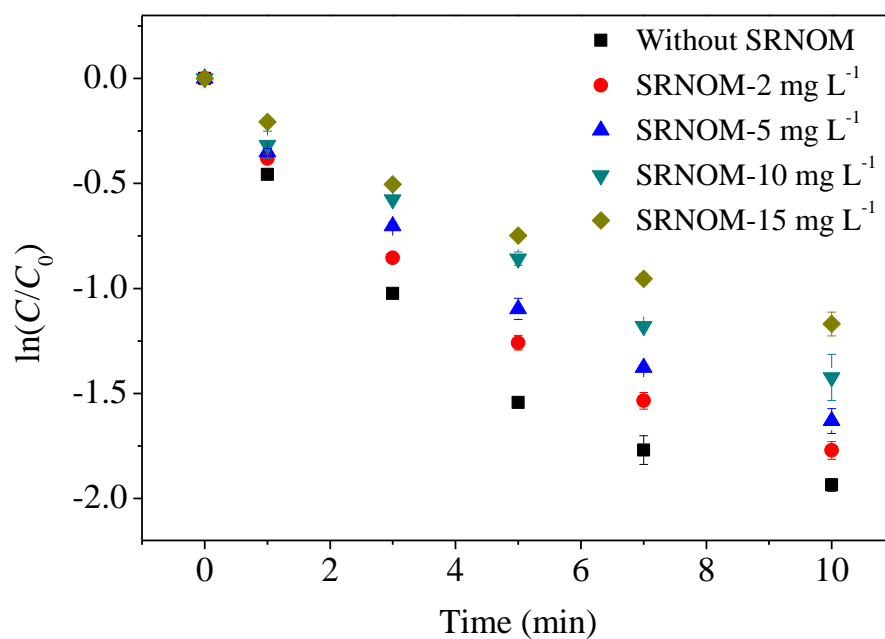

**Figure S5.** Degradation kinetics of CTZ in UV/chlorine system in the presence of SRNOM with different concentration (pH = 7.0, [CTZ]<sub>0</sub> = 10 μM, [Free chlorine]<sub>0</sub> = 100 μM).

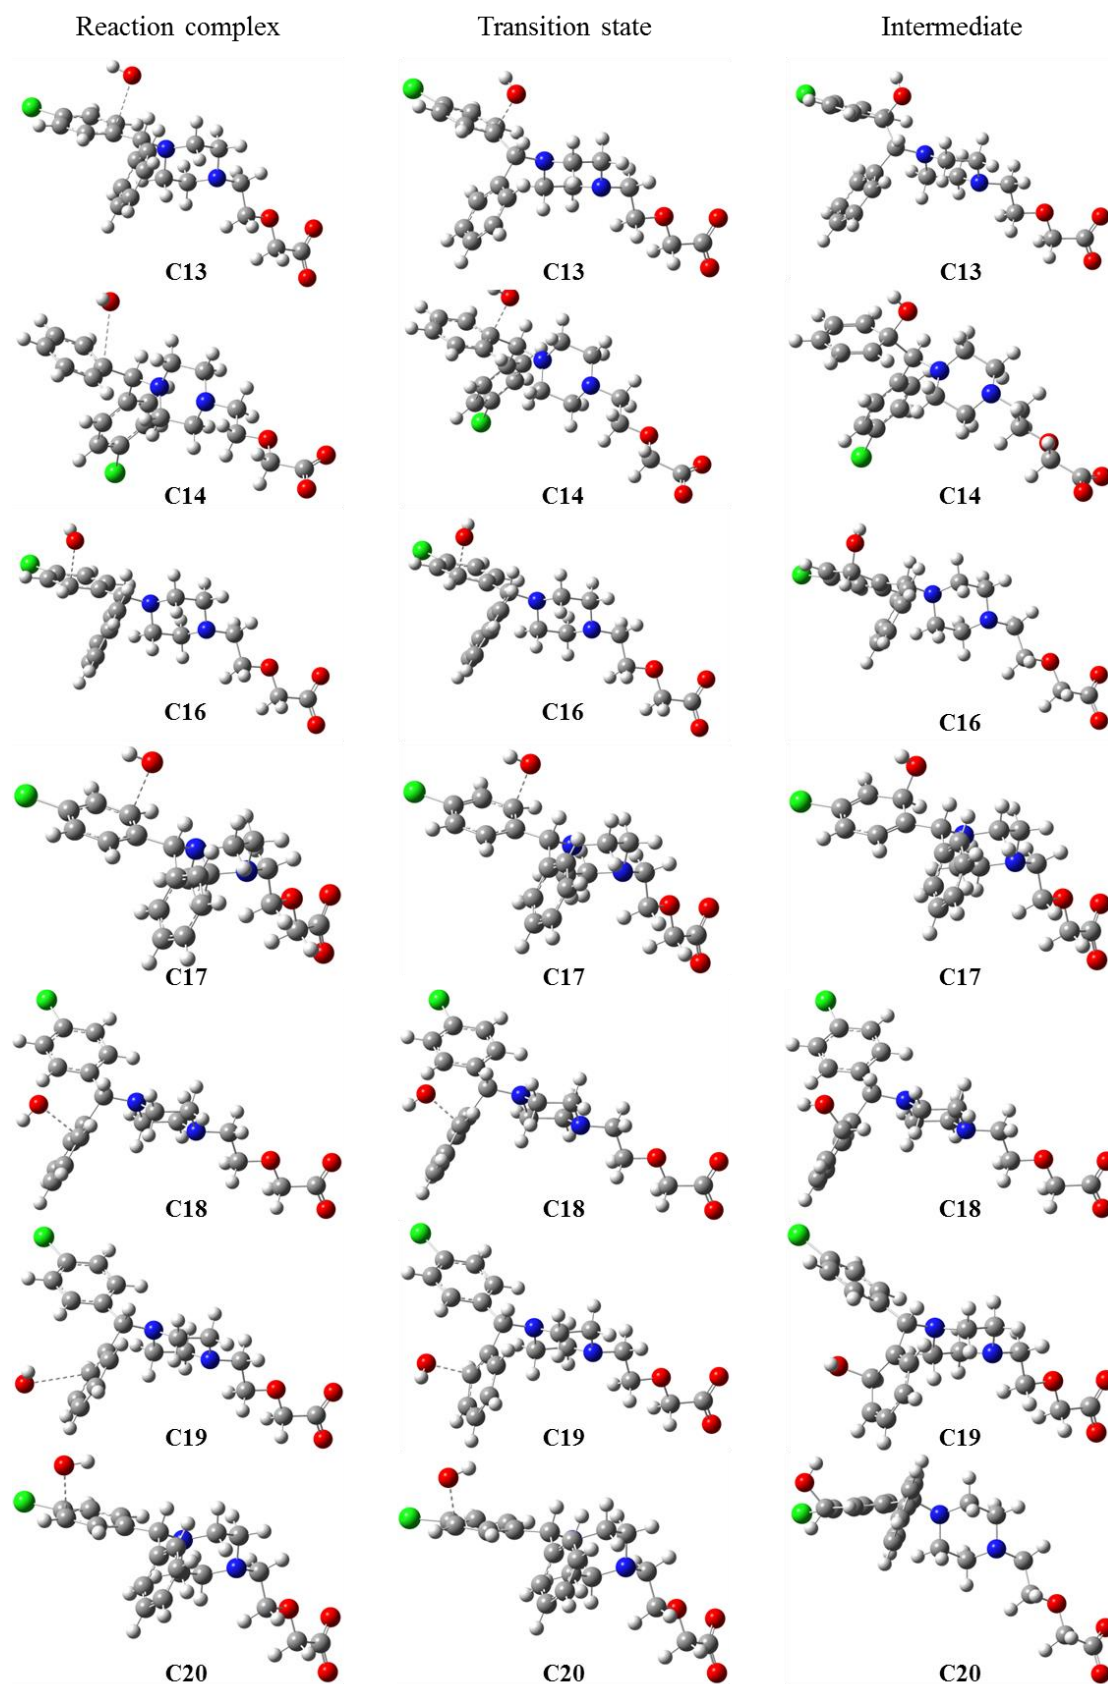

**Figure S6.** Reaction complexes, transition states and intermediates of the addition reaction pathways of CTZ with HO<sup>•</sup>

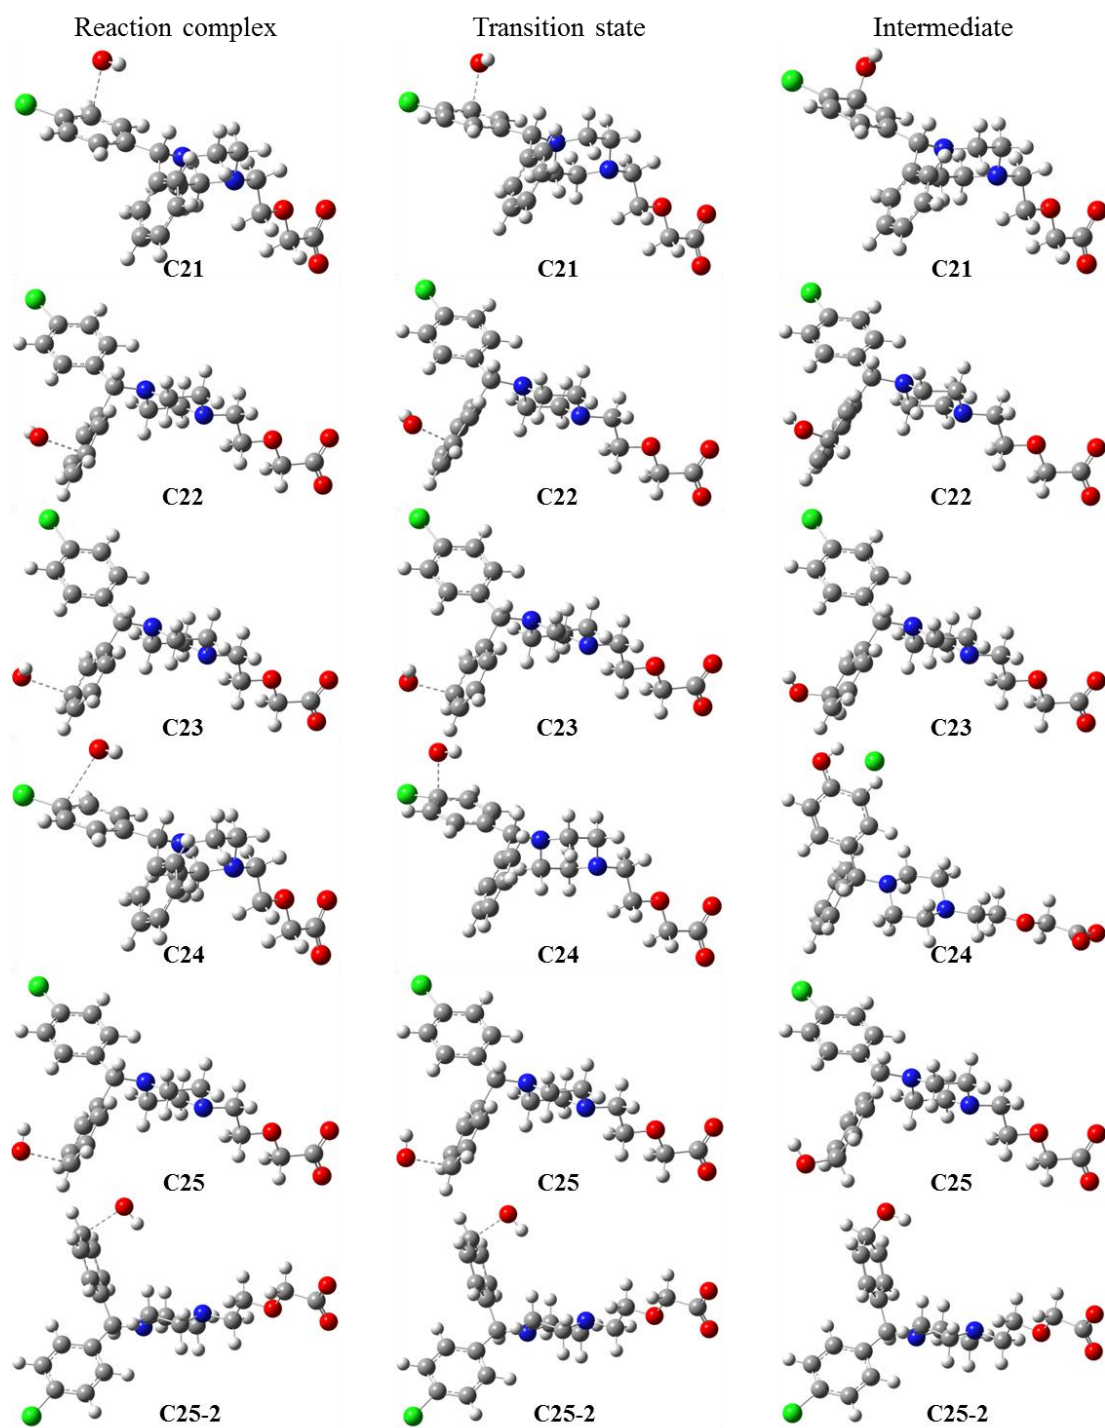

**Continued Figure S6.** Reaction complexes, transition states and intermediates of the addition reaction pathways of CTZ with HO<sup>•</sup>

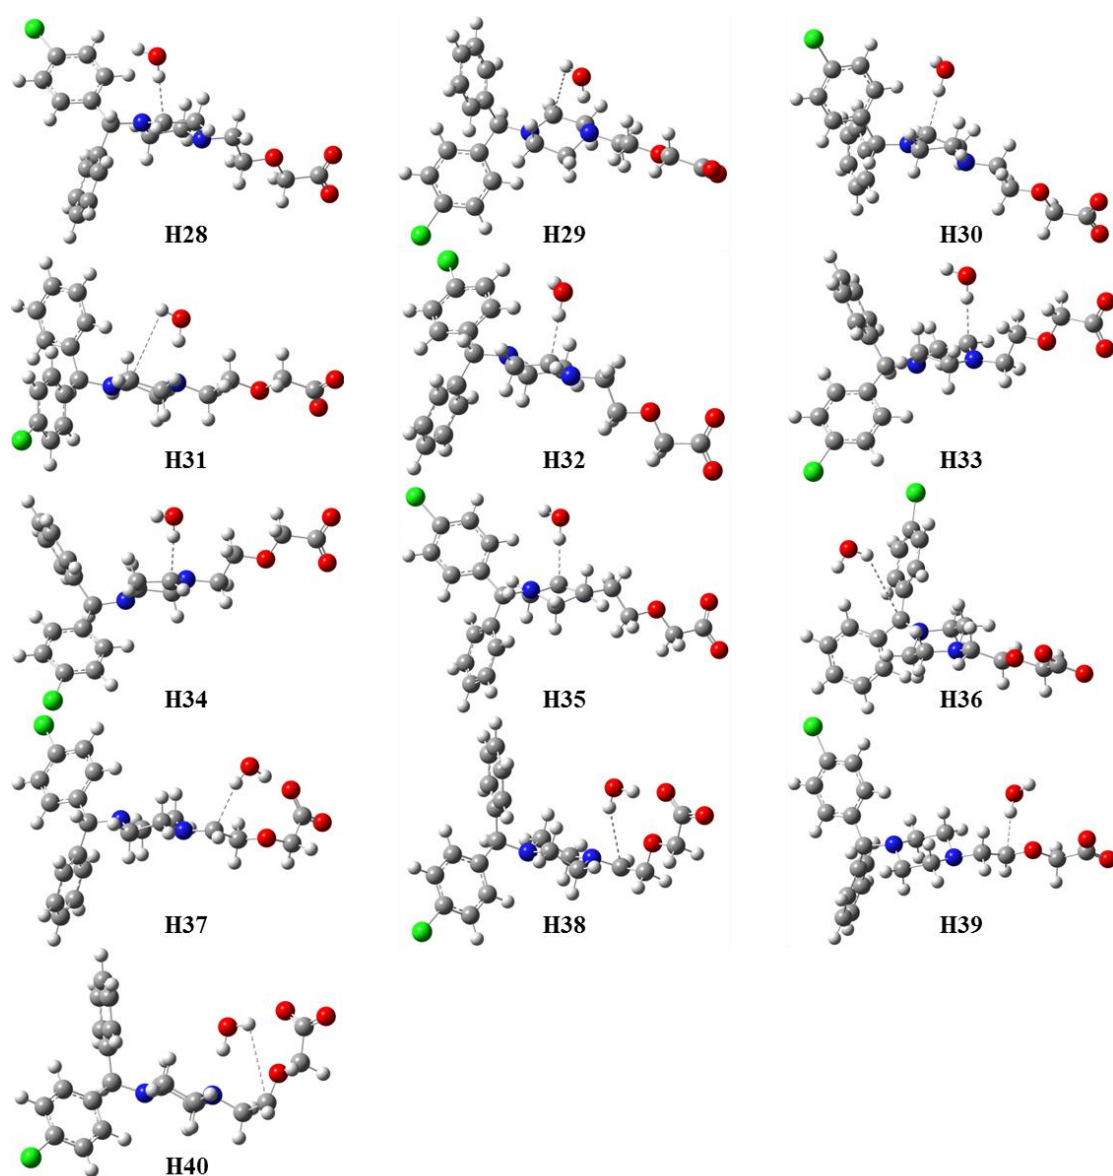

**Figure S7.** Reaction intermediates of barrierless H-abstraction reaction pathways of CTZ with  $\text{HO}^\bullet$



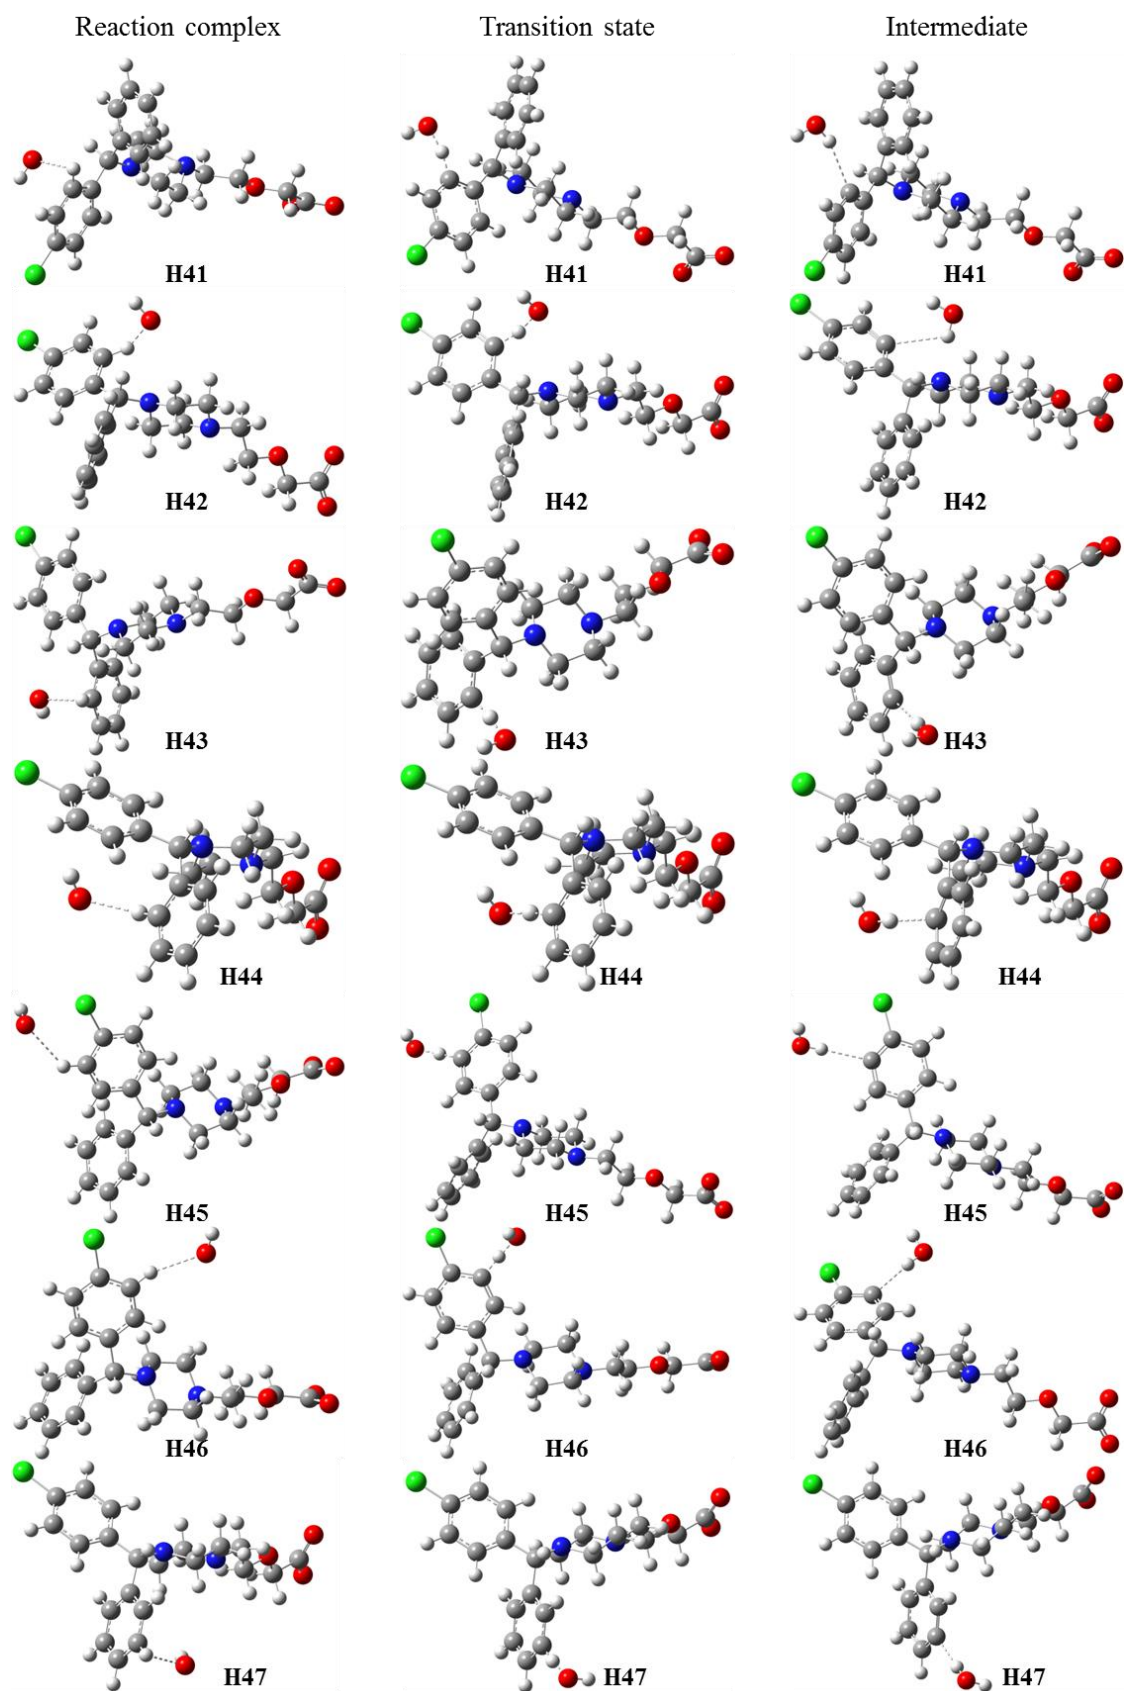

**Figure S8.** Reaction complexes, transition states and intermediates of the hydrogen abstraction pathways of CTZ with HO<sup>•</sup>

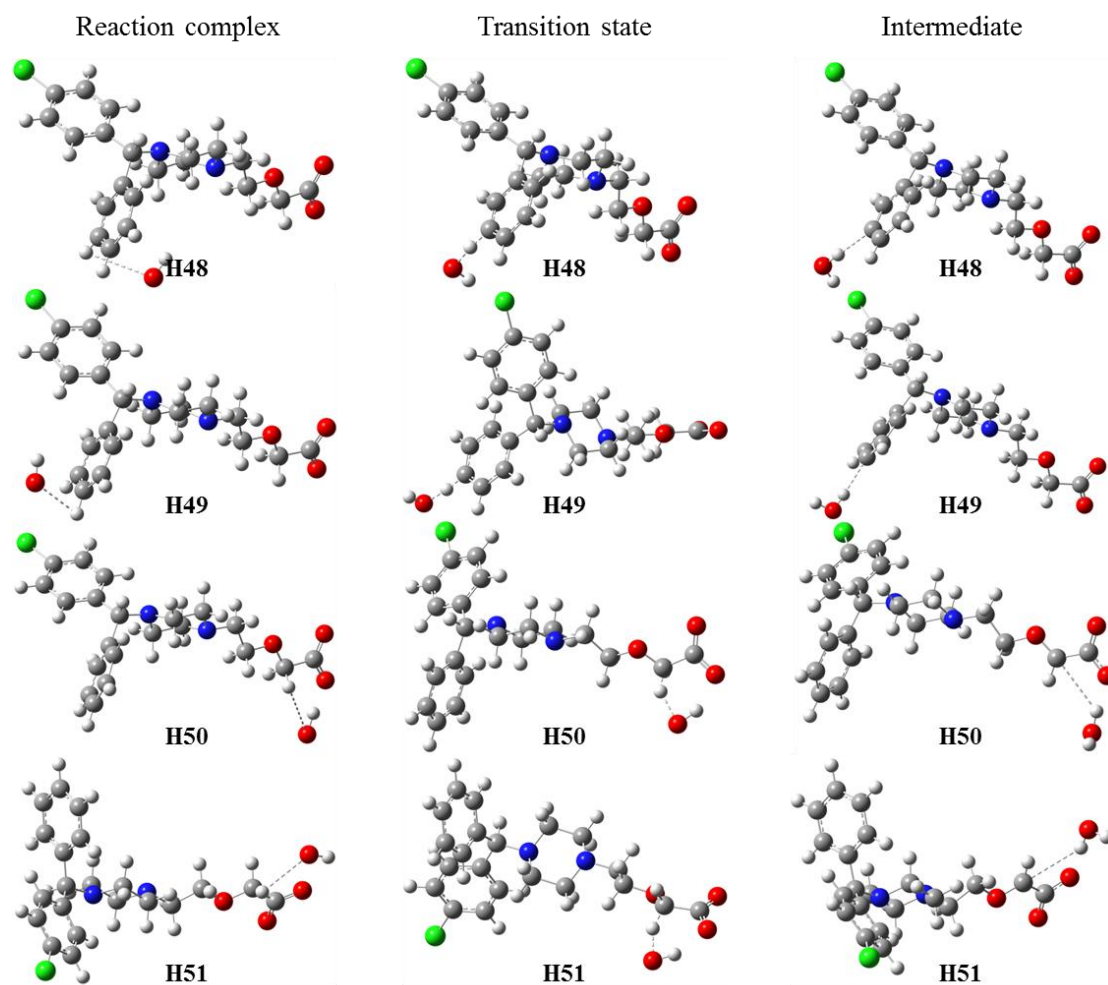

**Continued Figure S8.** Reaction complexes, transition states and intermediates of the hydrogen abstraction pathways of CTZ with HO<sup>•</sup>

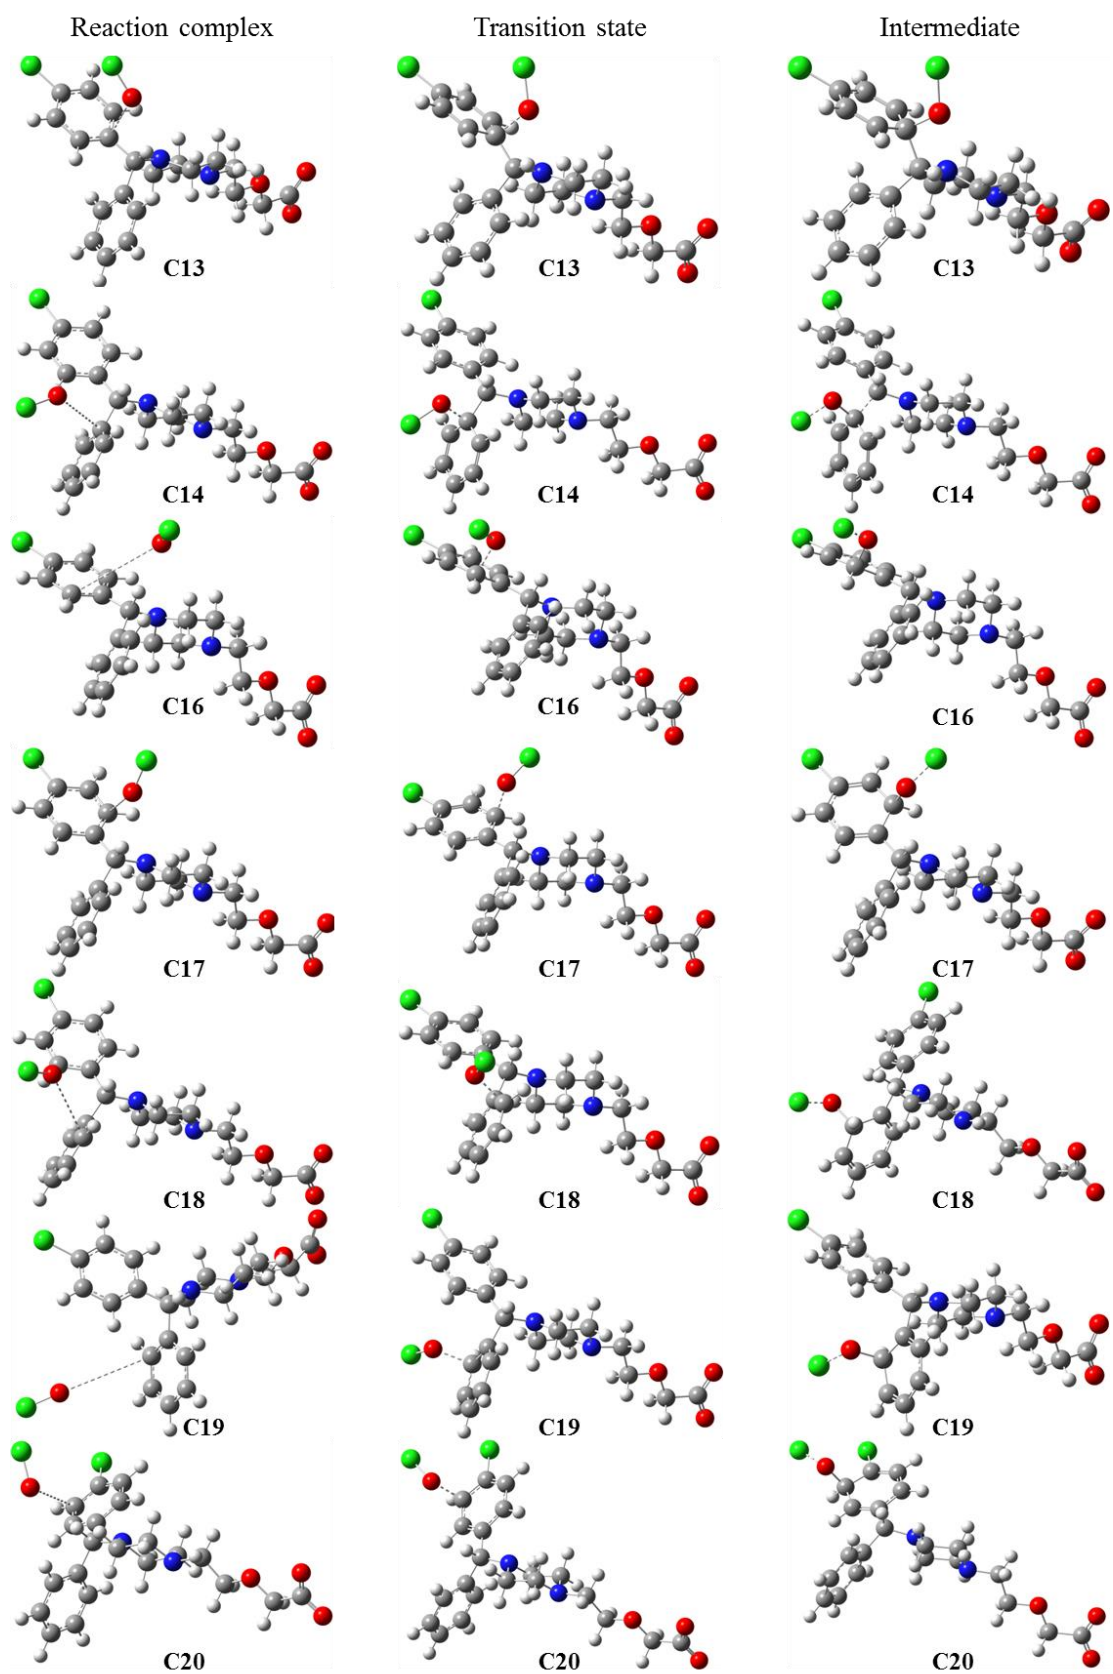

**Figure S9.** Reaction complexes, transition states and intermediates of the addition reaction pathways of CTZ with  $\text{ClO}^\bullet$

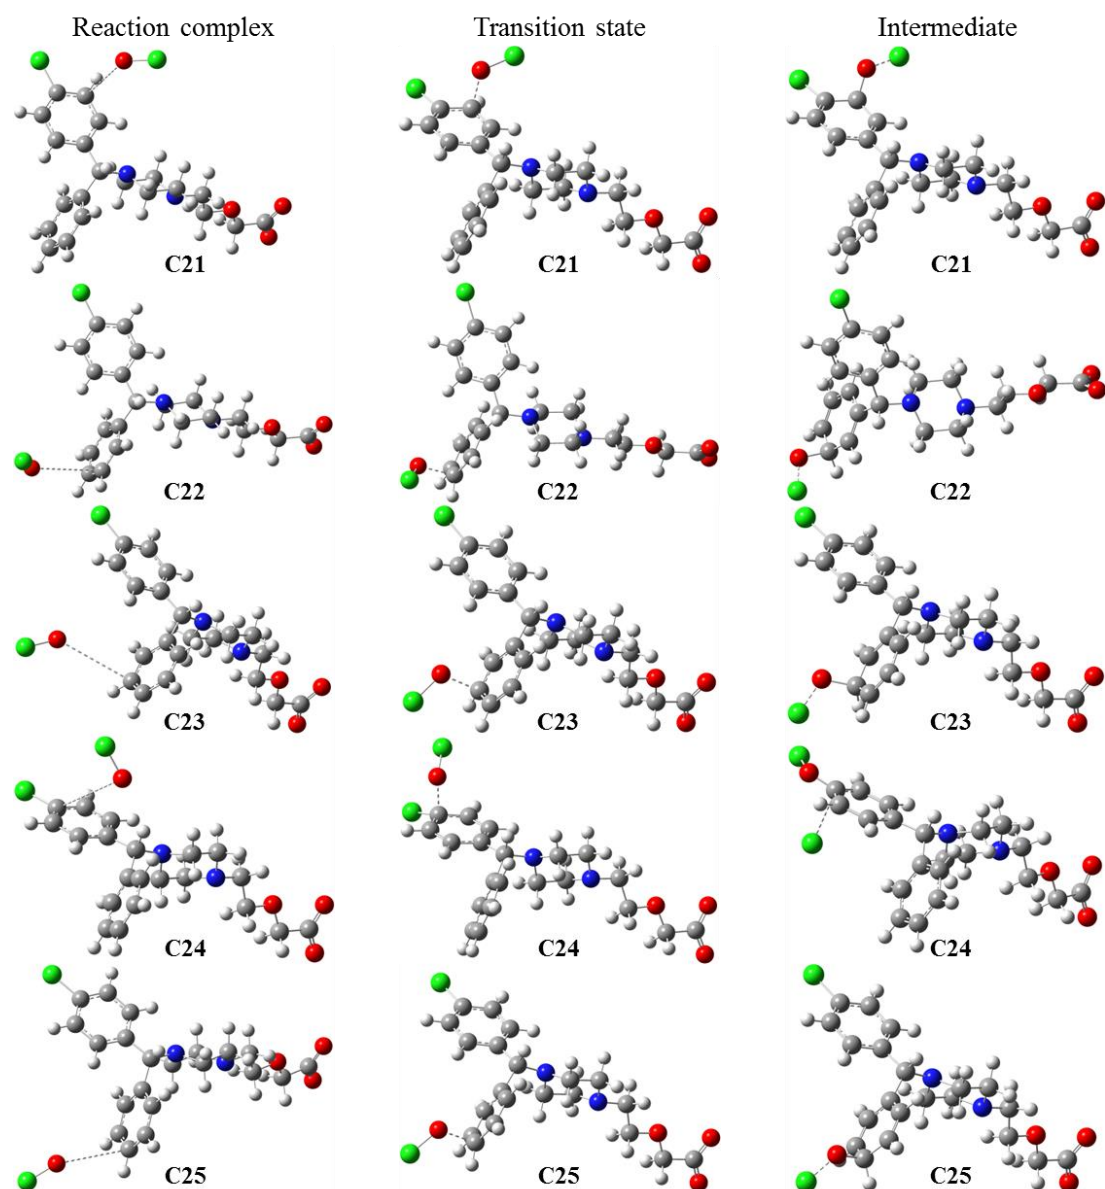

**Continued Figure S9.** Reaction complexes, transition states and intermediates of the addition reaction pathways of CTZ with  $\text{ClO}^\bullet$



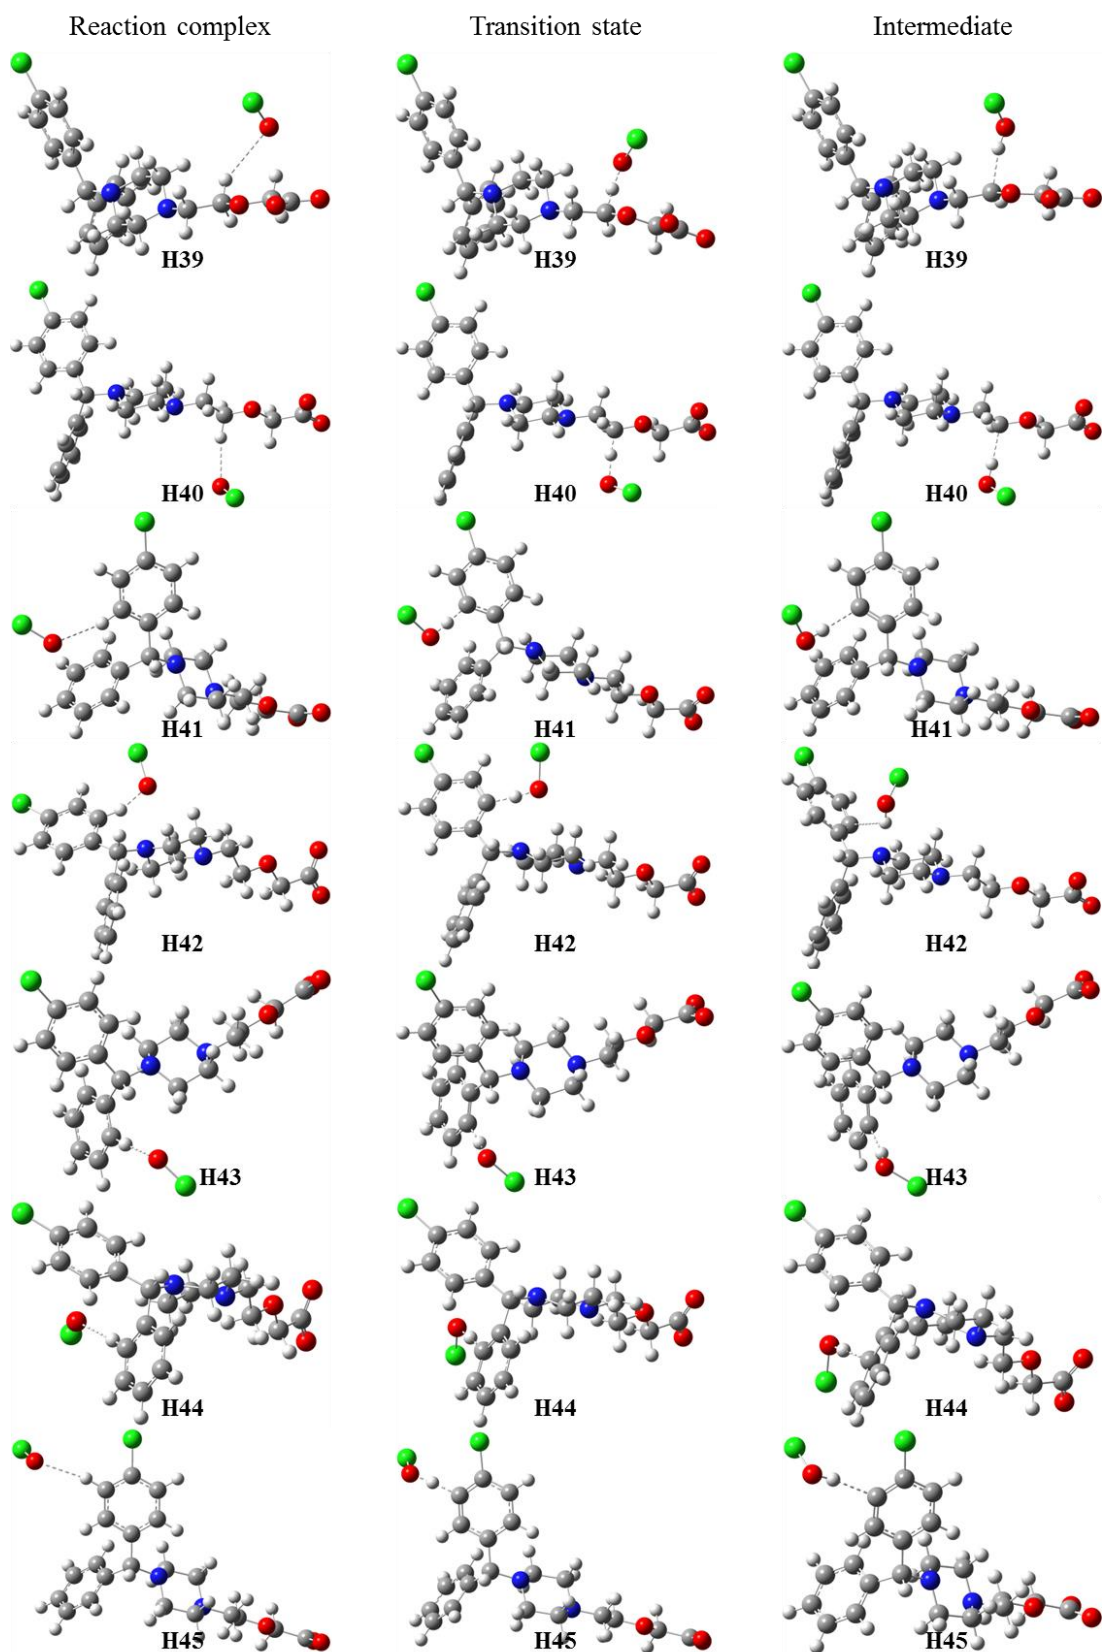

**Figure S10.** Reaction complexes, transition states and intermediates of the hydrogen abstraction reaction pathways of CTZ with ClO<sup>•</sup>

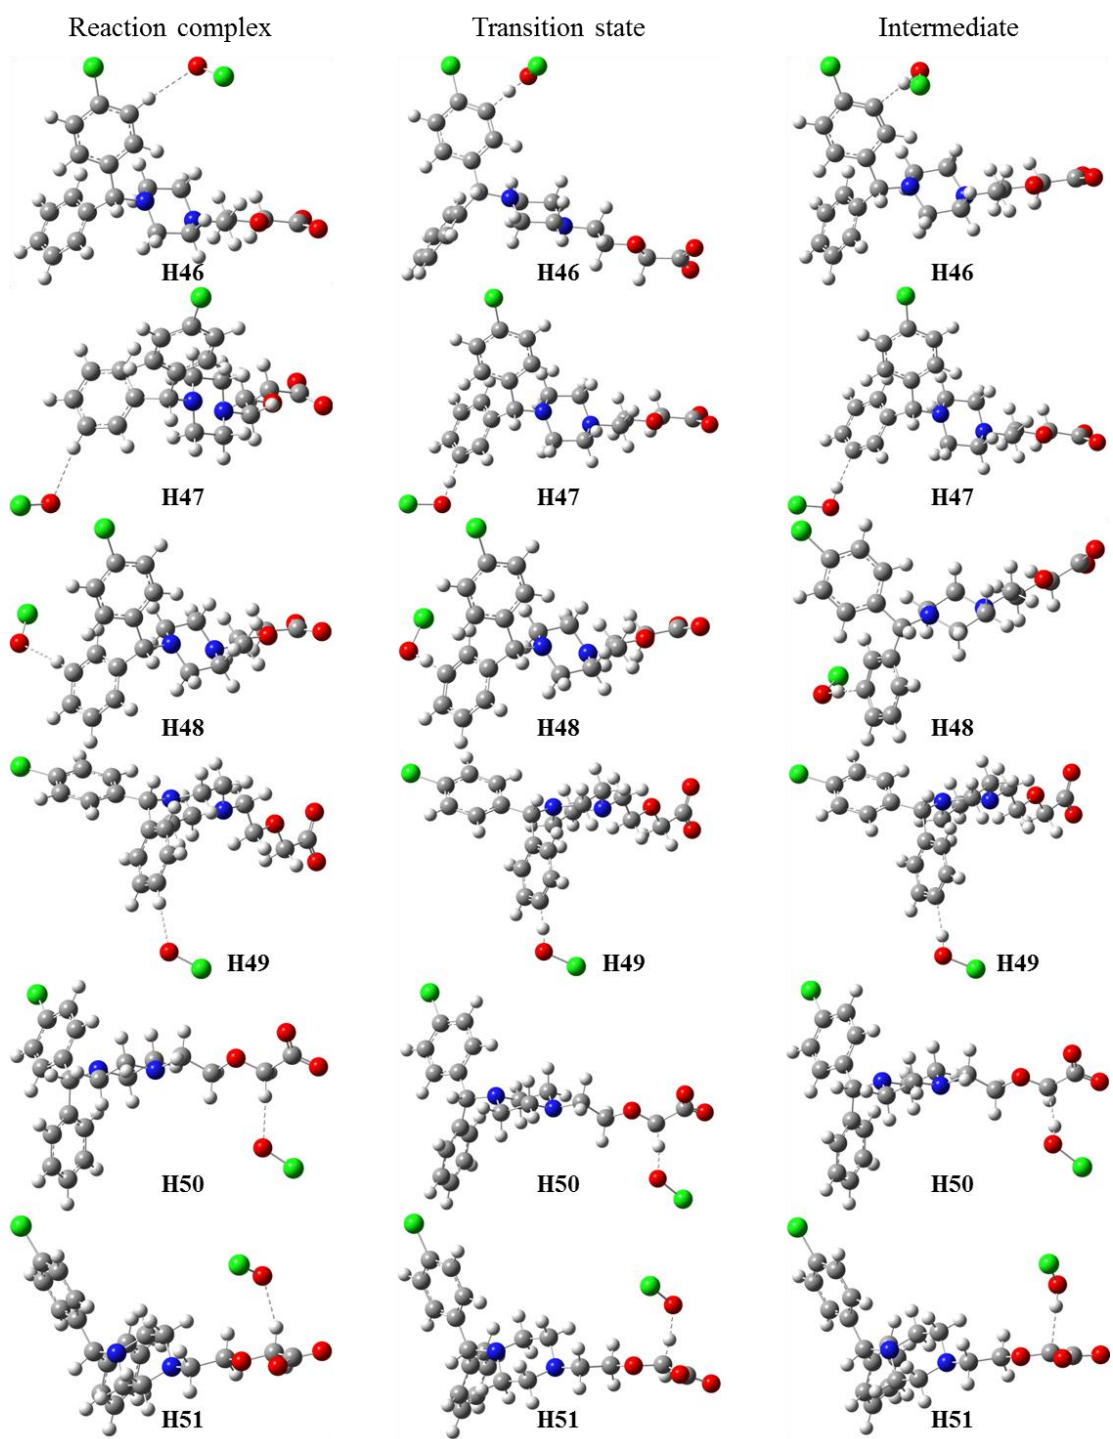

**Continued Figure S10.** Reaction complexes, transition states and intermediates of the hydrogen abstraction reaction pathways of CTZ with  $\text{ClO}^\bullet$

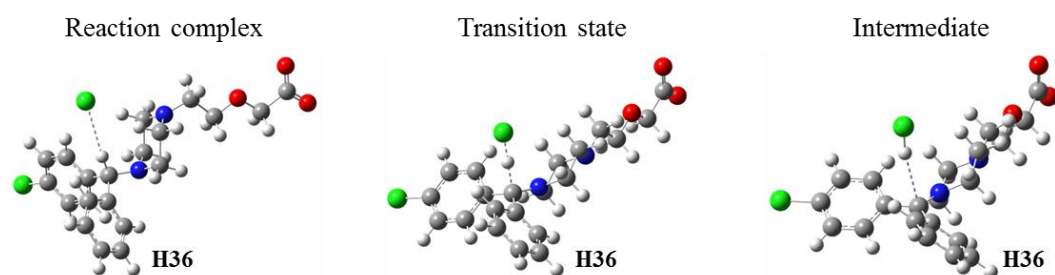

**Figure S11.** Reaction complexes, transition states and intermediates of the hydrogen abstraction reaction of H36 of CTZ with  $\text{Cl}^\bullet$

**Table S1** Contribution ratio of different reactive species and UV degradation to the degradation of CTZ ( $10\ \mu\text{M}$ ) in UV/chlorine system ( $[\text{Free chlorine}]_0 = 100\ \mu\text{M}$ ).

| Items |            | $\text{HO}^\bullet$ | $\text{Cl}^\bullet$ | $\text{ClO}^\bullet$ | UV    | Others |
|-------|------------|---------------------|---------------------|----------------------|-------|--------|
| Ratio | PBS        | 35.3%               | 7.3%                | 17.1%                | 38.7% | 1.6%   |
|       | With SRNOM | 29.6%               | 4.8%                | 21.2%                | 42.2% | 2.2%   |

**Table S2** Calculated Gibbs free energy change ( $\Delta G$ ), enthalpy change ( $\Delta H$ ) and activation free energy ( $\Delta G^\ddagger$ ) values for possible reaction pathways of HO $\cdot$  with CTZ  
(in kcal mol $^{-1}$ )

| Pathways   | Sites     | $\Delta G$ | $\Delta H$ | $\Delta G^\ddagger$ |
|------------|-----------|------------|------------|---------------------|
| HO $\cdot$ | C13       | -6.94      | -9.87      | 4.20                |
|            | C14       | -5.61      | -8.64      | 5.59                |
|            | C16       | -10.10     | -12.46     | 0.87                |
|            | C17       | -9.78      | -12.35     | 1.80                |
|            | C18       | -9.13      | -11.06     | 1.04                |
|            | C19       | -6.06      | -8.14      | 4.18                |
|            | C20       | -11.01     | -13.09     | 0.89                |
|            | C21       | -10.99     | -13.20     | 1.12                |
|            | C22       | -8.89      | -12.02     | 2.16                |
|            | C23       | -9.69      | -11.56     | 1.50                |
|            | C24 (-Cl) | -31.58     | -31.68     | 4.57                |
|            | C25       | -9.89      | -12.29     | 1.39                |
|            | H28       | -23.21     | -28.20     | barrierless         |
|            | H29       | -25.96     | -32.83     | barrierless         |
|            | H30       | -21.94     | -26.91     | barrierless         |
|            | H31       | -26.78     | -33.26     | barrierless         |
|            | H32       | -25.19     | -30.99     | barrierless         |
|            | H33       | -20.90     | -26.95     | barrierless         |
|            | H34       | -22.06     | -28.21     | barrierless         |
|            | H35       | -24.77     | -30.75     | barrierless         |
|            | H36       | -40.08     | -44.81     | barrierless         |
|            | H37       | -26.62     | -35.20     | barrierless         |
|            | H38       | -28.47     | -37.18     | barrierless         |
|            | H39       | -21.53     | -26.98     | barrierless         |
|            | H40       | -26.25     | -35.36     | barrierless         |
|            | H41       | -8.12      | -5.59      | 4.92                |
|            | H42       | -2.66      | -9.38      | 10.52               |
|            | H43       | -8.47      | -5.22      | 2.78                |
|            | H44       | -8.64      | -8.21      | 3.57                |
|            | H45       | -6.69      | -4.82      | 3.82                |
|            | H46       | -6.58      | -6.12      | 4.18                |
|            | H47       | -8.59      | -5.28      | 1.66                |
|            | H48       | -7.84      | -5.05      | 2.69                |
|            | H49       | -6.95      | -4.41      | 2.84                |
|            | H50       | -30.98     | -29.70     | 2.50                |
|            | H51       | -34.38     | -32.75     | 1.72                |



**Table S3** Calculated Gibbs free energy change ( $\Delta G$ ), enthalpy change ( $\Delta H$ ) and activation free energy ( $\Delta G^\ddagger$ ) values for possible reaction pathways of ClO $\cdot$  with CTZ  
(in kcal mol $^{-1}$ )

| Pathways    | Sites         | $\Delta G$ | $\Delta H$ | $\Delta G^\ddagger$ |
|-------------|---------------|------------|------------|---------------------|
| ClO $\cdot$ | addition      | C13        | 10.06      | 6.73                |
|             |               | C14        | 16.69      | 10.28               |
|             |               | C16        | 8.92       | 4.09                |
|             |               | C17        | 9.15       | 4.34                |
|             |               | C18        | 9.76       | 4.28                |
|             |               | C19        | 11.32      | 7.79                |
|             |               | C20        | 11.24      | 4.71                |
|             |               | C21        | 11.24      | 4.71                |
|             |               | C22        | 10.83      | 3.85                |
|             |               | C23        | 10.90      | 3.77                |
|             |               | C24 (-Cl)  | -2.18      | -6.40               |
|             |               | C25        | 9.64       | 3.16                |
|             | H-abstraction | H39        | -3.28      | -5.47               |
|             |               | H40        | -3.55      | -6.79               |
|             |               | H41        | 15.60      | 15.24               |
|             |               | H42        | 18.90      | 10.71               |
|             |               | H43        | 17.30      | 14.93               |
|             |               | H44        | 14.82      | 14.00               |
|             |               | H45        | 19.21      | 17.90               |
|             |               | H46        | 19.57      | 17.42               |
|             |               | H47        | 14.69      | 15.52               |
|             |               | H48        | 18.42      | 14.95               |
|             |               | H49        | 15.98      | 15.55               |
|             |               | H50        | -9.54      | -11.36              |
|             |               | H51        | -9.11      | -10.33              |
